# Supplementary material
Source: PubMed Central journal article supplement (PMC3511820)
Supplement: NIHMS386075-supplement-01.pdf [file NIHMS386075-supplement-01.pdf]

### **Online Supplement Figure Legends**

**Online Figure I: FACS Analysis of Cellular Markers in Non-Modified (CD34<sup>NM</sup>), or Modified CD34+ Cells.** Modified (CD34<sup>Shh</sup> and CD34<sup>EV</sup>) and naïve cells (CD34<sup>NM</sup>) were subjected to cell antigen analysis via FACS to determine whether the modification procedure was altering the short-term capacity of CD34+ cells to maintain expression of their stem cell antigens. Shown are representative examples of cultured CD34<sup>NM</sup>, CD34<sup>EV</sup> and CD34<sup>Shh</sup> showing no change in the populational proportions of cells that express various stem cell and lineage markers at 24 hours post-modification. These images represent one of three independent experiments, all of which revealed similar findings.

**Online Figure II: Validation of the sub-therapeutic CD34<sup>+</sup> cell dose threshold. A.** When intra-myocardially injected with  $2.5 \times 10^4$  CD34<sup>NM</sup>, mice fail to display improvements in ejection fraction and fractional shortening as compared to saline treated mice. Conversely, mice injected with  $5.0 \times 10^4$  CD34<sup>NM</sup> cells do show protection against losses in function at 4 weeks post-AMI. Both infarct size (depicted in **B**) and capillary density (depicted in **C**) are also not influenced by the sub-threshold  $2.5 \times 10^4$  CD34<sup>NM</sup> dose. Bars on all graphs represent the group means  $\pm$  SE. \* represents  $p < 0.05$  assessed with a one-way ANOVA and the post-hoc Holm-Sidak test.

**Online Figure III: CD34<sup>Shh</sup> Produce Shh-containing Exosomes that then Physically Transfer Shh to Other Cell Types and Promote Shh Signaling. A.** Treatment of

HUVECs with exosomes derived from CD34<sup>Shh</sup> (CD34<sup>Shh</sup> Ex) for 16 hours results in Shh protein transfer into HUVECS as assessed by Shh ELISA. **B.** Treatment of NIH3T3 cells (previously transfected with Gli-luciferase and  $\beta$ -galactosidase vectors) with exosomes derived from CD34<sup>Shh</sup> (CD34<sup>Shh</sup> Ex) for 16 hours results in enhanced induction of luciferase activity as compared to cells treated with exosomes from CD34<sup>EV</sup>. Bars for both **A** and **B** depict replicate means  $\pm$  SEM and are representative examples of at least 2 independent experiments.

**Online Table I**

Human Primer and Probe Sequences for Real Time Quantitative RT-PCR

| <b>Gene</b> | <b>Forward Primer</b>     | <b>Reverse Primer</b>  | <b>Probe</b>              |
|-------------|---------------------------|------------------------|---------------------------|
| <b>Shh</b>  | CGGCTTCGACTGGGTGTACT      | GCAGCCTCCCGATTGG       | CTCAGAGGTGTAAGGAC         |
| <b>Smo</b>  | CCTGTTTGCCATGTTTGGAA      | CCAGGTACGCCTCCAGATGA   | TGGCATCGCCATGAGCACCTG     |
| <b>Ptc1</b> | CTGCCACCAAGTGATCGT        | GATTCGGGATGGACCACAGT   | AAGCCACAGAAAACCCCGTCTTCGC |
| <b>Gli1</b> | TCGGGCACCATCCATTCTA       | TCAGTCTGCTTTCCTCCCTGAT | CCTTCCCGCTCCCTCTTGGGCT    |
| <b>18S</b>  | ACGAGACTCTGGCATGCTAACTAGT | CGCCACTTGTCCTCTAAGAA   | ACGCGACCCCGAGCGGT         |

### Online Figure I



## Online Figure II



### Online Figure III
